# Supplementary material for: Effects of Long-Term Storage at −80 °C on the Human Plasma Metabolome
Source: PubMed Central journal article supplement (PMC6572224; doi:10.3390/metabo9050099), 2019-05-17
Supplement: metabolites-09-00099-s001.pdf [file metabolites-09-00099-s001.pdf]

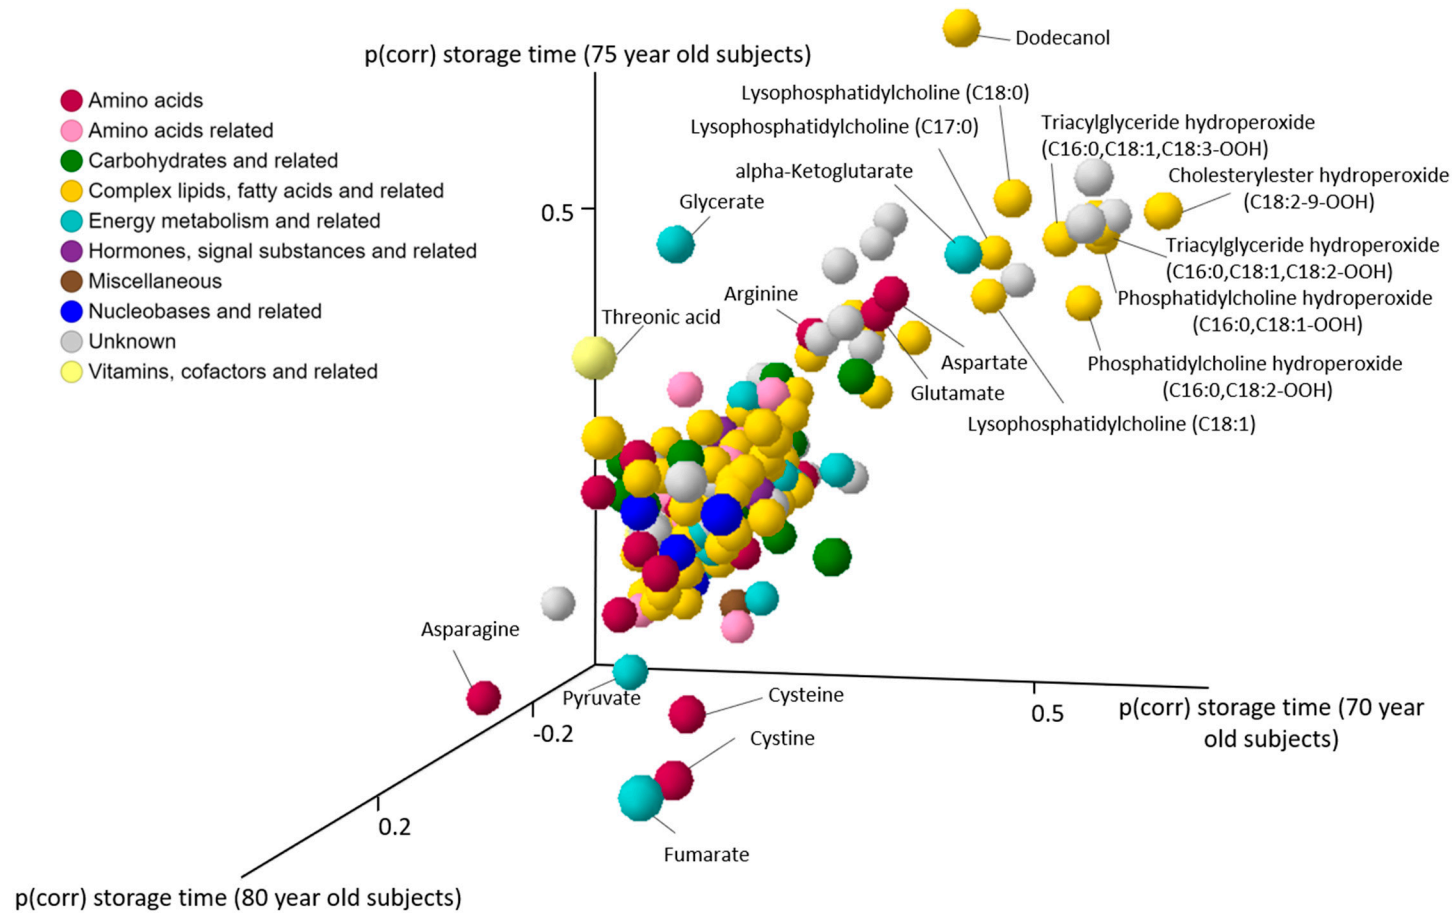

**Figure 1.** Shared and Unique Structures (SUS) plot comparing contribution of metabolites to the separation of samples according to storage time by OPLS. Multivariate Analysis was performed within the respective subject age groups. Metabolites are colored according to ontology class.

**Table S1.** Impact of different storage times at -80°C on human plasma metabolite concentrations. Fourteen analytes with final chemical structure identity pending are not indicated. Statistical analysis was performed by ANOVA. Metabolites with p-value < 0.05 and FDR < 0.05 were considered significantly altered (marked by \* in the ratio column). The term "add." (in addition) indicates that quantification could be disturbed by small amounts of metabolites that have identical analytical characteristics with respect to the quantification method. Concentrations for Metabolites marked with (SQ) are semi-quantitative, i.e. ratio relative to MxPool.

| Ontology 1          | Metabolite                                                | Storage for 4 to < 7 years, ratio vs. storage for < 4 years (subject age 80 years) | Storage for 9 to < 11 years, ratio vs. storage for 7 to < 9 years (subject age 75 years) | Storage for 14 to < 16 years, ratio vs. storage for 11 to < 14 years (subject age 70 years) | Storage for 4 to < 7 years, p-value vs. storage for < 4 years (subject age 80 years) | Storage for 9 to < 11 years, p-value vs. storage for 7 to < 9 years (subject age 75 years) | Storage for 14 to < 16 years, p-value vs. storage for 11 to < 14 years (subject age 70 years) | Storage for 4 to < 7 years vs. storage for < 4 years, FDR (subject age 80 years) | Storage for 9 to < 11 years vs. storage for 7 to < 9 years, FDR (subject age 75 years) | Storage for 14 to < 16 years vs. storage for 11 to < 14 years (subject age 70 years) | Storage for < 4 years, mean concentration [ $\mu\text{mol/L}$ ] (subject age 80 years) | Storage for 4 to < 7 years, mean concentration [ $\mu\text{mol/L}$ ] (subject age 80 years) | Storage for 7 to < 9 years, mean concentration [ $\mu\text{mol/L}$ ] (subject age 75 years) | Storage for 9 to < 11 years, mean concentration [ $\mu\text{mol/L}$ ] (subject age 75 years) | Storage for 11 to < 14 years, mean concentration [ $\mu\text{mol/L}$ ] (subject age 70 years) | Storage for 14 to < 16 years, mean concentration [ $\mu\text{mol/L}$ ] (subject age 70 years) |
|---------------------|-----------------------------------------------------------|------------------------------------------------------------------------------------|------------------------------------------------------------------------------------------|---------------------------------------------------------------------------------------------|--------------------------------------------------------------------------------------|--------------------------------------------------------------------------------------------|-----------------------------------------------------------------------------------------------|----------------------------------------------------------------------------------|----------------------------------------------------------------------------------------|--------------------------------------------------------------------------------------|----------------------------------------------------------------------------------------|---------------------------------------------------------------------------------------------|---------------------------------------------------------------------------------------------|----------------------------------------------------------------------------------------------|-----------------------------------------------------------------------------------------------|-----------------------------------------------------------------------------------------------|
| Amino acids         | Aspartate                                                 | 1.02                                                                               | 1.21*                                                                                    | 1.07*                                                                                       | 5.0E-01                                                                              | 5.2E-12                                                                                    | 5.6E-03                                                                                       | 9.5E-01                                                                          | 6.7E-11                                                                                | 4.8E-02                                                                              | 4.58                                                                                   | 4.72                                                                                        | 7.95                                                                                        | 9.58                                                                                         | 10.38                                                                                         | 11.25                                                                                         |
|                     | Glutamate                                                 | 1.03                                                                               | 1.35*                                                                                    | 0.98                                                                                        | 5.6E-01                                                                              | 3.9E-13                                                                                    | 5.9E-01                                                                                       | 9.5E-01                                                                          | 5.3E-12                                                                                | 8.3E-01                                                                              | 43.69                                                                                  | 44.66                                                                                       | 115.44                                                                                      | 154.35                                                                                       | 197.65                                                                                        | 197.03                                                                                        |
|                     | Arginine                                                  | 0.97                                                                               | 1.06*                                                                                    | 1.03                                                                                        | 4.8E-02                                                                              | 5.8E-05                                                                                    | 4.0E-02                                                                                       | 6.2E-01                                                                          | 3.6E-04                                                                                | 1.9E-01                                                                              | 79.98                                                                                  | 77.81                                                                                       | 84.25                                                                                       | 89.80                                                                                        | 97.18                                                                                         | 100.68                                                                                        |
|                     | Asparagine                                                | 1.01                                                                               | 0.87*                                                                                    | 0.96                                                                                        | 6.1E-01                                                                              | 2.4E-10                                                                                    | 3.1E-02                                                                                       | 9.5E-01                                                                          | 2.6E-09                                                                                | 1.7E-01                                                                              | 42.26                                                                                  | 41.86                                                                                       | 32.25                                                                                       | 27.71                                                                                        | 22.78                                                                                         | 21.53                                                                                         |
|                     | Glutamine                                                 | 1.01                                                                               | 0.86*                                                                                    | 1.01                                                                                        | 7.3E-01                                                                              | 1.4E-07                                                                                    | 8.1E-01                                                                                       | 9.5E-01                                                                          | 1.2E-06                                                                                | 9.2E-01                                                                              | 670.72                                                                                 | 667.03                                                                                      | 472.35                                                                                      | 404.03                                                                                       | 381.75                                                                                        | 381.57                                                                                        |
|                     | Histidine                                                 | 1.01                                                                               | 1.03*                                                                                    | 0.99                                                                                        | 3.0E-01                                                                              | 1.0E-02                                                                                    | 5.1E-01                                                                                       | 9.5E-01                                                                          | 4.1E-02                                                                                | 7.8E-01                                                                              | 86.76                                                                                  | 87.70                                                                                       | 90.66                                                                                       | 93.08                                                                                        | 87.86                                                                                         | 87.26                                                                                         |
|                     | Cysteine (add. Cystine)                                   | 1.03                                                                               | 0.88*                                                                                    | 1.02                                                                                        | 2.2E-01                                                                              | 3.3E-10                                                                                    | 2.0E-01                                                                                       | 9.5E-01                                                                          | 3.5E-09                                                                                | 5.0E-01                                                                              | 85.58                                                                                  | 88.03                                                                                       | 59.29                                                                                       | 52.24                                                                                        | 34.39                                                                                         | 34.75                                                                                         |
|                     | Cystine                                                   | 1.11*                                                                              | 0.82*                                                                                    | 1.02                                                                                        | 7.3E-04                                                                              | 1.7E-13                                                                                    | 5.2E-01                                                                                       | 2.8E-02                                                                          | 2.5E-12                                                                                | 7.8E-01                                                                              | 33.97                                                                                  | 36.71                                                                                       | 19.75                                                                                       | 16.04                                                                                        | 12.80                                                                                         | 12.65                                                                                         |
| Amino acids related | 5-Oxoproline (add. Folic acid, Glutamate, Glutamine) (SQ) | 1.01                                                                               | 1.04*                                                                                    | 1.00                                                                                        | 4.7E-01                                                                              | 8.7E-05                                                                                    | 8.7E-01                                                                                       | 9.5E-01                                                                          | 5.0E-04                                                                                | 9.4E-01                                                                              | 1.10                                                                                   | 1.10                                                                                        | 1.18                                                                                        | 1.22                                                                                         | 1.25                                                                                          | 1.26                                                                                          |
|                     | beta-Alanine (add. Pantothenic acid)                      | 1.01                                                                               | 0.95*                                                                                    | 1.01                                                                                        | 6.8E-01                                                                              | 7.6E-03                                                                                    | 4.5E-01                                                                                       | 9.5E-01                                                                          | 3.3E-02                                                                                | 7.4E-01                                                                              | 1.84                                                                                   | 1.85                                                                                        | 1.86                                                                                        | 1.75                                                                                         | 1.52                                                                                          | 1.52                                                                                          |

|                                         |                                                                                                    |      |       |       |         |         |         |         |         |         |        |        |        |        |        |        |
|-----------------------------------------|----------------------------------------------------------------------------------------------------|------|-------|-------|---------|---------|---------|---------|---------|---------|--------|--------|--------|--------|--------|--------|
|                                         | Ornithine (add. Arginine, Citrulline)                                                              | 1.02 | 1.06* | 0.99  | 2.0E-01 | 2.4E-06 | 5.0E-01 | 9.5E-01 | 1.7E-05 | 7.7E-01 | 57.13  | 57.82  | 63.75  | 67.44  | 59.01  | 58.80  |
| Carbohydrates and related               | 3-Deoxyglucosone (SQ)                                                                              | 0.95 | 1.02  | 0.92* | 1.6E-01 | 5.7E-01 | 3.1E-03 | 9.3E-01 | 7.2E-01 | 3.5E-02 | 0.98   | 0.93   | 0.93   | 0.95   | 0.99   | 0.91   |
|                                         | Ribose (add. Pentoses)                                                                             | 0.98 | 1.05* | 0.98  | 2.7E-01 | 2.7E-03 | 2.3E-01 | 9.5E-01 | 1.3E-02 | 5.3E-01 | 0.34   | 0.33   | 0.33   | 0.35   | 0.35   | 0.34   |
|                                         | scyllo-Inositol                                                                                    | 0.94 | 1.03  | 0.90* | 1.9E-01 | 4.6E-01 | 1.2E-03 | 9.5E-01 | 6.1E-01 | 2.3E-02 | 2.19   | 2.14   | 1.95   | 2.03   | 1.87   | 1.76   |
|                                         | Erythronic acid                                                                                    | 1.02 | 1.08* | 1.02  | 2.3E-01 | 2.8E-06 | 2.4E-01 | 9.5E-01 | 1.8E-05 | 5.3E-01 | 3.09   | 3.15   | 3.39   | 3.66   | 3.26   | 3.34   |
| Complex lipids, fatty acids and related | Ceramide (d18:1,C24:0)                                                                             | 1.02 | 1.07* | 0.97  | 4.6E-01 | 9.5E-03 | 2.1E-01 | 9.5E-01 | 3.8E-02 | 5.2E-01 | 2.22   | 2.28   | 2.87   | 3.10   | 3.09   | 3.05   |
|                                         | Ceramide (d18:1,C24:1) (add. Ceramide (d18:2,C24:0))                                               | 0.99 | 1.08* | 0.99  | 7.5E-01 | 2.2E-03 | 6.6E-01 | 9.5E-01 | 1.1E-02 | 8.7E-01 | 1.14   | 1.15   | 1.43   | 1.57   | 1.56   | 1.56   |
|                                         | Cholesterol, free                                                                                  | 1.01 | 0.95* | 1.01  | 4.6E-01 | 2.3E-03 | 4.9E-01 | 9.5E-01 | 1.1E-02 | 7.7E-01 | 912.56 | 920.18 | 752.58 | 716.77 | 698.28 | 702.03 |
|                                         | Isopalmitic acid (C16:0)                                                                           | 1.00 | 1.07* | 1.00  | 9.1E-01 | 5.7E-03 | 8.8E-01 | 9.6E-01 | 2.5E-02 | 9.4E-01 | 3.28   | 3.26   | 3.20   | 3.44   | 3.37   | 3.40   |
|                                         | Eicosaenoic acid (C20:cis[11]1)                                                                    | 1.01 | 1.07* | 1.00  | 6.0E-01 | 9.6E-03 | 8.5E-01 | 9.5E-01 | 3.9E-02 | 9.4E-01 | 14.68  | 14.94  | 15.71  | 16.88  | 16.30  | 16.48  |
|                                         | Palmitoleic acid (C16:cis[9]1)                                                                     | 1.05 | 1.11* | 1.00  | 1.4E-01 | 1.3E-03 | 9.1E-01 | 9.3E-01 | 7.3E-03 | 9.4E-01 | 195.65 | 210.98 | 224.16 | 254.42 | 251.38 | 256.62 |
|                                         | conjugated Linoleic acid (C18:trans[9,11]2) (add. conjugated Linoleic acid (C18:cis[9]trans[11]2)) | 1.01 | 1.08* | 1.04  | 7.6E-01 | 2.2E-03 | 1.1E-01 | 9.5E-01 | 1.1E-02 | 3.6E-01 | 15.01  | 15.15  | 15.72  | 16.99  | 18.20  | 18.91  |
|                                         | Myristic acid (C14:0)                                                                              | 1.04 | 1.11* | 1.02  | 2.9E-01 | 2.6E-03 | 4.8E-01 | 9.5E-01 | 1.3E-02 | 7.7E-01 | 100.66 | 106.29 | 113.93 | 127.52 | 121.82 | 125.88 |

|                                                                                                                                                                               |      |       |       |         |         |         |         |         |         |         |         |         |         |         |         |
|-------------------------------------------------------------------------------------------------------------------------------------------------------------------------------|------|-------|-------|---------|---------|---------|---------|---------|---------|---------|---------|---------|---------|---------|---------|
| Palmitic acid<br>(C16:0)                                                                                                                                                      | 1.02 | 1.06* | 1.01  | 4.0E-01 | 8.4E-03 | 7.7E-01 | 9.5E-01 | 3.5E-02 | 9.2E-01 | 2456.42 | 2529.31 | 2762.15 | 2931.65 | 2720.84 | 2763.63 |
| Dodecanol (SQ)                                                                                                                                                                | 1.07 | 2.25* | 1.17* | 1.9E-01 | 2.2E-68 | 9.7E-05 | 9.5E-01 | 5.1E-66 | 3.4E-03 | 0.75    | 0.79    | 1.12    | 2.51    | 3.60    | 4.20    |
| Cholesterylester<br>hydroperoxide<br>(C18:2-9-OOH)<br>(add.<br>Cholesterylester<br>hydroperoxide<br>(C18:2-13-OOH),<br>Cholesterylester<br>hydroperoxide<br>(C20:4-OOH)) (SQ) | 1.02 | 1.81* | 1.24* | 7.6E-01 | 6.7E-24 | 4.5E-05 | 9.5E-01 | 3.9E-22 | 2.2E-03 | 0.24    | 0.24    | 1.39    | 2.52    | 4.20    | 5.28    |
| Phosphatidylcholi<br>ne hydroperoxide<br>(C16:0,C18:1-<br>OOH) (SQ)                                                                                                           | 0.97 | 1.81* | 1.28* | 7.3E-01 | 2.1E-18 | 6.4E-05 | 9.5E-01 | 5.3E-17 | 2.7E-03 | 0.70    | 0.68    | 4.39    | 7.92    | 10.31   | 13.29   |
| Phosphatidylcholi<br>ne hydroperoxide<br>(C16:0,C18:2-<br>OOH) (SQ)                                                                                                           | 1.02 | 1.27* | 1.18* | 7.4E-01 | 6.7E-09 | 1.4E-05 | 9.5E-01 | 6.8E-08 | 1.3E-03 | 0.58    | 0.59    | 1.26    | 1.61    | 1.71    | 2.02    |
| Phosphatidylcholi<br>ne hydroperoxide<br>(C18:0,C18:2-<br>OOH) (SQ)                                                                                                           | 0.92 | 1.62* | 1.25  | 4.8E-01 | 1.6E-06 | 1.6E-02 | 9.5E-01 | 1.2E-05 | 1.1E-01 | 0.62    | 0.57    | 2.60    | 4.21    | 11.71   | 14.60   |
| Triacylglyceride<br>hydroperoxide<br>(C16:0,C18:1,C18:2<br>-OOH) (SQ)                                                                                                         | 1.05 | 2.16* | 1.29* | 5.8E-01 | 2.2E-20 | 7.4E-04 | 9.5E-01 | 7.4E-19 | 1.5E-02 | 0.24    | 0.26    | 1.90    | 4.10    | 4.55    | 5.98    |
| Triacylglyceride<br>hydroperoxide<br>(C16:0,C18:1,C18:3<br>-OOH) (add.<br>Triacylglyceride<br>hydroperoxide                                                                   | 1.04 | 1.86* | 1.23* | 6.1E-01 | 5.1E-17 | 2.2E-03 | 9.5E-01 | 9.8E-16 | 2.9E-02 | 0.40    | 0.42    | 2.16    | 4.03    | 5.04    | 6.28    |

---

(C16:0,C18:2,C18:2  
-OOH)) (SQ)

---

|                                                                                                                        |      |       |       |         |         |         |         |         |         |        |        |        |        |        |        |
|------------------------------------------------------------------------------------------------------------------------|------|-------|-------|---------|---------|---------|---------|---------|---------|--------|--------|--------|--------|--------|--------|
| Glycerol, polar fraction                                                                                               | 0.99 | 1.12* | 1.04  | 6.4E-01 | 2.9E-07 | 7.5E-02 | 9.5E-01 | 2.3E-06 | 3.0E-01 | 144.75 | 143.40 | 148.96 | 167.64 | 136.43 | 141.93 |
| Glycerol-3-phosphate, polar fraction                                                                                   | 0.95 | 2.09* | 1.18* | 5.5E-01 | 8.0E-30 | 3.3E-03 | 9.5E-01 | 9.3E-28 | 3.5E-02 | 2.16   | 2.05   | 13.13  | 27.49  | 23.07  | 27.53  |
| Lysophosphatidylcholine (C17:0)                                                                                        | 0.99 | 1.21* | 1.05  | 5.8E-01 | 4.5E-19 | 1.5E-02 | 9.5E-01 | 1.3E-17 | 1.1E-01 | 2.05   | 2.02   | 3.25   | 3.94   | 4.32   | 4.59   |
| Lysophosphatidylcholine (C18:0)                                                                                        | 1.03 | 1.13* | 1.04* | 8.8E-02 | 3.7E-16 | 3.6E-03 | 8.7E-01 | 6.2E-15 | 3.6E-02 | 35.04  | 36.06  | 49.98  | 56.35  | 59.08  | 61.78  |
| Lysophosphatidylcholine (C18:1)                                                                                        | 0.99 | 1.03* | 1.03* | 4.2E-01 | 7.9E-07 | 1.9E-05 | 9.5E-01 | 5.7E-06 | 1.3E-03 | 29.92  | 29.75  | 32.26  | 33.30  | 35.38  | 36.34  |
| Lysophosphatidylcholine (C18:2)                                                                                        | 0.98 | 1.05* | 1.04  | 4.7E-01 | 8.2E-03 | 2.6E-02 | 9.5E-01 | 3.5E-02 | 1.6E-01 | 37.28  | 36.90  | 47.60  | 50.15  | 55.48  | 58.38  |
| Lysophosphatidylcholine (C20:4)                                                                                        | 0.98 | 1.08* | 1.01  | 2.7E-01 | 4.8E-07 | 6.7E-01 | 9.5E-01 | 3.7E-06 | 8.7E-01 | 9.06   | 8.86   | 11.22  | 12.18  | 12.02  | 12.22  |
| Lysophosphatidylethanolamine (C22:5)                                                                                   | 0.99 | 0.97* | 1.00  | 4.5E-01 | 1.3E-02 | 8.5E-01 | 9.5E-01 | 4.9E-02 | 9.4E-01 | 1.81   | 1.79   | 1.68   | 1.63   | 1.61   | 1.60   |
| Phosphatidylcholine (C16:0,C16:0)                                                                                      | 1.01 | 1.03* | 1.01  | 5.8E-01 | 5.0E-03 | 4.3E-01 | 9.5E-01 | 2.3E-02 | 7.3E-01 | 14.45  | 14.54  | 15.02  | 15.42  | 14.96  | 15.12  |
| Phosphatidylcholine (C16:0,C20:5)                                                                                      | 0.99 | 0.95* | 1.00  | 5.3E-01 | 5.2E-03 | 7.8E-01 | 9.5E-01 | 2.3E-02 | 9.2E-01 | 38.23  | 37.89  | 36.77  | 35.01  | 34.66  | 34.91  |
| Phosphatidylcholine (C18:0,C20:3)<br>(add.<br>Phosphatidylcholine (C20:1,C18:2),<br>Phosphatidylcholine (C20:2,C18:1)) | 1.01 | 1.00  | 0.97* | 6.8E-01 | 1.0E+00 | 3.7E-03 | 9.5E-01 | 1.0E+00 | 3.6E-02 | 38.34  | 38.51  | 39.81  | 39.81  | 38.11  | 36.83  |

---

|                               |                                                                                 |       |       |       |         |         |         |         |         |         |         |         |         |         |         |        |
|-------------------------------|---------------------------------------------------------------------------------|-------|-------|-------|---------|---------|---------|---------|---------|---------|---------|---------|---------|---------|---------|--------|
|                               | Phosphatidylcholine (C18:0,C20:4)                                               | 1.00  | 0.99  | 0.99* | 7.3E-01 | 9.4E-02 | 2.6E-03 | 9.5E-01 | 2.4E-01 | 3.1E-02 | 108.10  | 107.69  | 108.49  | 107.50  | 106.42  | 104.88 |
|                               | Phosphatidylcholine (C18:1,C18:2) (add. Phosphatidylcholine (C16:0,C20:3))      | 1.01  | 1.00  | 0.98* | 3.7E-01 | 4.6E-01 | 3.1E-04 | 9.5E-01 | 6.1E-01 | 7.8E-03 | 167.44  | 168.27  | 167.63  | 168.24  | 170.45  | 167.66 |
|                               | erythro-Dihydro sphingosine (d16:0)                                             | 0.98  | 1.04  | 1.11* | 7.0E-01 | 3.1E-01 | 3.9E-03 | 9.5E-01 | 5.1E-01 | 3.6E-02 | 37.67   | 36.89   | 41.94   | 43.76   | 38.61   | 43.79  |
|                               | Sphingomyelin (d18:1,C16:0)                                                     | 0.99  | 1.04* | 1.02  | 6.5E-01 | 3.8E-05 | 6.3E-02 | 9.5E-01 | 2.5E-04 | 2.8E-01 | 105.31  | 104.83  | 105.20  | 109.78  | 121.88  | 124.27 |
|                               | TAG (C16:0,C18:1,C18:3) (add. TAG (C16:0,C18:2,C18:2), TAG (C16:1,C18:1,C18:2)) | 0.97  | 1.02  | 0.91* | 4.8E-01 | 6.8E-01 | 4.4E-03 | 9.5E-01 | 7.8E-01 | 3.9E-02 | 53.29   | 51.37   | 52.74   | 53.14   | 43.37   | 38.86  |
|                               | TAG (C18:2,C18:2)                                                               | 0.96  | 0.99  | 0.90* | 3.8E-01 | 8.4E-01 | 3.9E-03 | 9.5E-01 | 8.8E-01 | 3.6E-02 | 82.25   | 78.02   | 80.52   | 78.92   | 61.19   | 54.19  |
| Energy metabolism and related | alpha-Ketoglutarate (SQ)                                                        | 1.04  | 1.37* | 1.03  | 4.0E-01 | 1.3E-16 | 4.3E-01 | 9.5E-01 | 2.4E-15 | 7.3E-01 | 0.76    | 0.79    | 1.63    | 2.24    | 2.13    | 2.21   |
|                               | Fumarate                                                                        | 1.06* | 0.96* | 1.00  | 2.0E-06 | 4.7E-05 | 8.8E-01 | 1.1E-04 | 3.0E-04 | 9.4E-01 | 2.76    | 2.91    | 2.76    | 2.65    | 2.40    | 2.39   |
|                               | 2-Hydroxybutyrate                                                               | 1.03  | 0.96  | 0.93* | 3.0E-01 | 1.0E-01 | 1.8E-03 | 9.5E-01 | 2.6E-01 | 2.8E-02 | 48.45   | 50.14   | 48.12   | 46.05   | 55.35   | 51.20  |
|                               | Dodecanoylcarnitine                                                             | 1.01  | 1.00  | 1.09* | 8.0E-01 | 9.9E-01 | 2.1E-03 | 9.5E-01 | 9.9E-01 | 2.9E-02 | 0.17    | 0.17    | 0.16    | 0.15    | 0.11    | 0.12   |
|                               | Glycerate                                                                       | 1.02  | 1.30* | 0.99  | 5.5E-01 | 1.3E-17 | 6.8E-01 | 9.5E-01 | 2.8E-16 | 8.8E-01 | 7.84    | 8.10    | 13.69   | 17.83   | 19.71   | 20.04  |
|                               | Lactate                                                                         | 0.98  | 1.07* | 0.95  | 4.1E-01 | 2.2E-03 | 1.5E-02 | 9.5E-01 | 1.1E-02 | 1.1E-01 | 1026.14 | 1010.17 | 1159.17 | 1249.86 | 1044.13 | 992.26 |
|                               | Pyruvate (add. Phosphoenolpyruvate (PEP)) (SQ)                                  | 1.01  | 0.85* | 1.01  | 8.4E-01 | 6.1E-07 | 8.4E-01 | 9.5E-01 | 4.5E-06 | 9.4E-01 | 0.46    | 0.46    | 0.30    | 0.25    | 0.18    | 0.18   |

|                                       |                                                      |       |       |       |         |         |         |         |         |         |         |         |         |         |         |         |
|---------------------------------------|------------------------------------------------------|-------|-------|-------|---------|---------|---------|---------|---------|---------|---------|---------|---------|---------|---------|---------|
| Miscellaneous                         | Ethylenediamine<br>traacetic acid<br>(EDTA)          | 1.07* | 0.96* | 1.00  | 1.4E-10 | 7.8E-05 | 6.6E-01 | 1.0E-08 | 4.7E-04 | 8.7E-01 | 9054.24 | 9689.02 | 9829.88 | 9452.85 | 8417.62 | 8432.42 |
|                                       | Quinic acid (add.<br>Chlorogenic acid<br>(CGA)) (SQ) | 0.96  | 0.87* | 0.97  | 4.7E-01 | 3.6E-03 | 5.0E-01 | 9.5E-01 | 1.7E-02 | 7.7E-01 | 1.10    | 1.00    | 0.95    | 0.83    | 0.84    | 0.80    |
| Nucleobases and<br>related            | Uridine                                              | 0.97  | 0.96  | 0.95* | 1.2E-01 | 6.4E-02 | 1.8E-03 | 8.8E-01 | 1.9E-01 | 2.8E-02 | 4.00    | 3.86    | 4.10    | 3.95    | 4.17    | 3.94    |
| Vitamins,<br>cofactors and<br>related | Threonic acid                                        | 1.11* | 1.10* | 0.95  | 5.0E-04 | 3.0E-04 | 3.2E-02 | 2.3E-02 | 1.7E-03 | 1.7E-01 | 3.36    | 3.75    | 5.06    | 5.58    | 5.72    | 5.51    |

**Table 2.** Results of OPLS models with storage time as Y-variable in different subject age groups.

| Subject Age Group | R <sup>2</sup> Y(cum) | Q <sup>2</sup> (cum) |
|-------------------|-----------------------|----------------------|
| 70 years          | 0.289                 | 0.188                |
| 75 years          | 0.485                 | 0.308                |
| 80 years          | 0.415                 | 0.181                |
